# Supplementary material for: Probing the role of dispersion energy on structural transformation of double-stranded xylo- and ribo-nucleic acids
Source: Royal Society of Chemistry journal article supplement (doi:10.1039/c8cp06305b), 2019-01-01
Supplement: c8cp06305b1.pdf [file c8cp06305b1.pdf]

## Probing the role of dispersion energy on structural transformation of double-stranded xylo- and ribo- nucleic acids

Anuj Kumar,<sup>\*ab</sup> and G. Naresh Patwari <sup>\*a</sup>

<sup>a</sup>. Department of Chemistry, Indian Institute of Technology Bombay, Powai, Mumbai 400076 INDIA. E-mail: anuj.cpl@iitb.ac.in (AK) and naresh@chem.iitb.ac.in (GNP)

<sup>b</sup>. Prithvi Chand Vigyan College, Jai Prakash Vishwavidyalaya, Chapra - Saran, Bihar 841301 INDIA

**Table S1. H-rise, rise, h-twist and twist parameters obtained following 3DNA analysis for the double-stranded RNA and XNA at various time points.**

| Scaling Factor for $\epsilon$<br>→ | 0.01          |                 | 1.00          |                 | 5.00          |                 |
|------------------------------------|---------------|-----------------|---------------|-----------------|---------------|-----------------|
|                                    | h-rise (rise) | h-twist (twist) | h-rise (rise) | h-twist (twist) | h-rise (rise) | h-twist (twist) |
| <b>RNA (Initial)</b>               | 3.4 (3.4)     | 36.3 (36.2)     | 3.4 (3.4)     | 36.3 (36.2)     | 3.4 (3.4)     | 36.3 (36.2)     |
| <b>RNA (0 ns)</b>                  | 3.4 (3.4)     | 37.5 (37.0)     | 3.3 (3.4)     | 37.4 (35.9)     | 3.3 (3.4)     | 37.4 (35.9)     |
| <b>RNA (20 ns)</b>                 | 4.6 (6.7)     | 6.4 (12.5)      | 3.2 (3.5)     | 32.9 (30.6)     | 3.1 (3.3)     | 39.9 (38.8)     |
| <b>RNA (80 ns)</b>                 |               |                 | 2.6 (3.3)     | 31.9 (28.4)     | 2.8 (3.2)     | 49.8 (46.7)     |
| <b>XNA (Initial)</b>               | 3.5 (3.2)     | 15.5 (11.2)     | 3.5 (3.2)     | 15.5 (11.2)     | 3.5 (3.2)     | 15.5 (11.2)     |
| <b>XNA (0 ns)</b>                  | 2.5 (3.6)     | 18.7 (12.0)     | 3.1 (3.7)     | 17.2 (12.1)     | 2.5 (3.6)     | 18.7 (12.0)     |
| <b>XNA (20 ns)</b>                 | 3.2 (5.2)     | -5.9 (1.0)      | 2.8 (3.3)     | -1.1 (0.1)      | 1.9 (3.1)     | -0.9 (1.4)      |
| <b>XNA (80 ns)</b>                 | --            | --              | 1.5 (3.5)     | 7.2 (4.9)       | 3.1 (3.5)     | -1.6 (-3.1)     |

In Table S1 “Initial” indicates the starting structure for the simulation while “0 ns” indicates the equilibrated structure prior to production run.

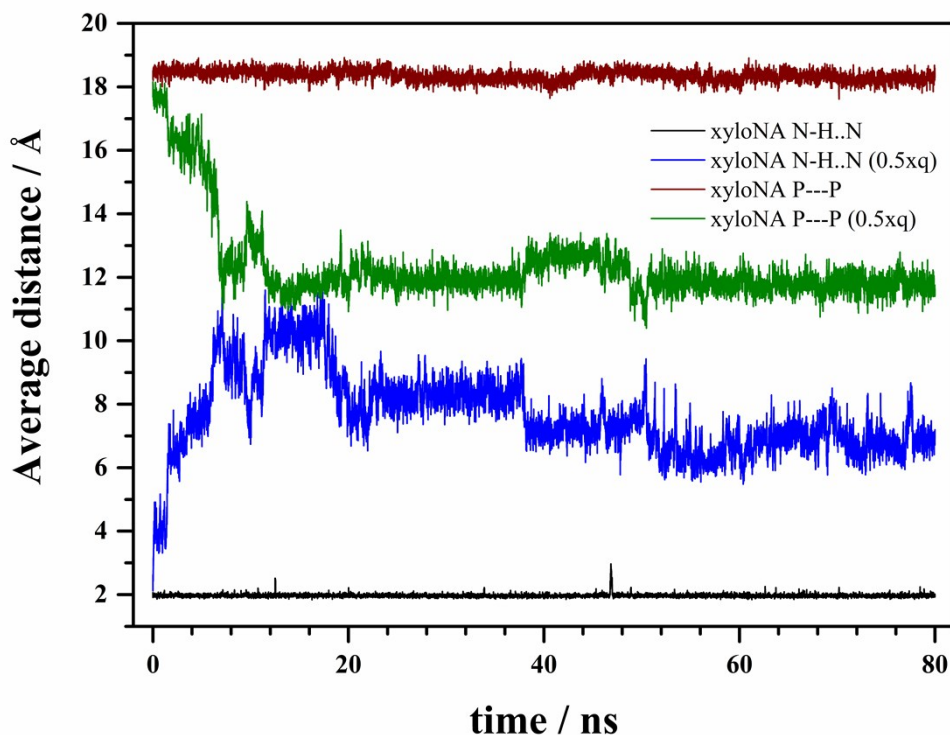

**Fig. S1.** Plots of average inter-strand N–H···N hydrogen bonded distance (black – unscaled; blue – scaling factor for the charges 0.5) and average inter-strand distance between phosphorus atoms (brown – unscaled; green – scaling factor of the charges 0.5) for the double-stranded XNA as a function of simulation time. Various curves correspond to simulations carried out by scaling electrostatic energy (charges). The decrease in the electrostatic energy leads to almost instantaneous change in the double-helix structure due breaking of the N–H···N hydrogen bonds followed by base flipping, which is captured by increase in the N–H···N hydrogen bonded distance and decrease in the inter-strand P---P distance.

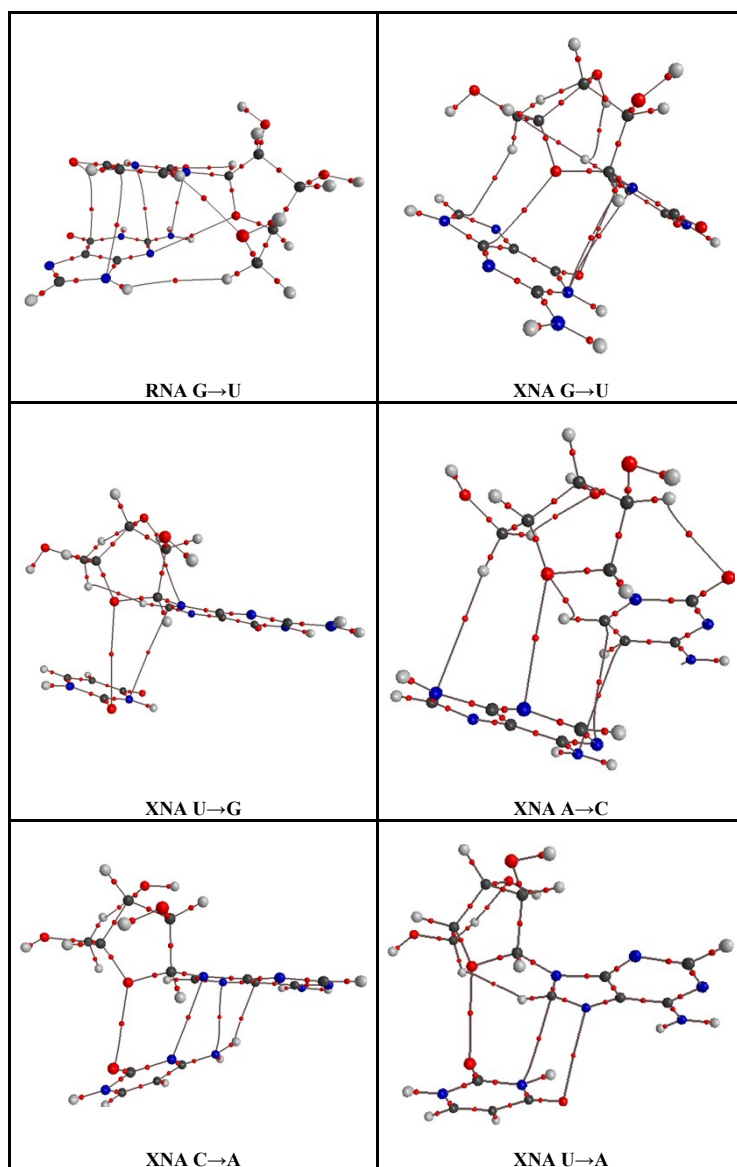

**Fig. S2.** Molecular graphs for the XNA, depicting the presence of bond critical point for the  $Lp \cdots \pi$  interaction between the oxygen atom of the xylose and the adjacent nucleobase in XNA. Also shown is for RNA for sake of comparison, which does not show a bond critical point corresponding to  $Lp \cdots \pi$  interaction.
